# Supplementary material
Source: MDPI journal article supplement (https://www.mdpi.com/2073-4441/10/12/1810)
Supplement: s1 [file s1 › water-400687-SI.pdf]

# Supplementary Materials: Projected Changes in Hydrological Variables in the Agricultural Region of Alberta, Canada

Mohammad Badrul Masud, Jannatul Ferdous and Monireh Faramarzi

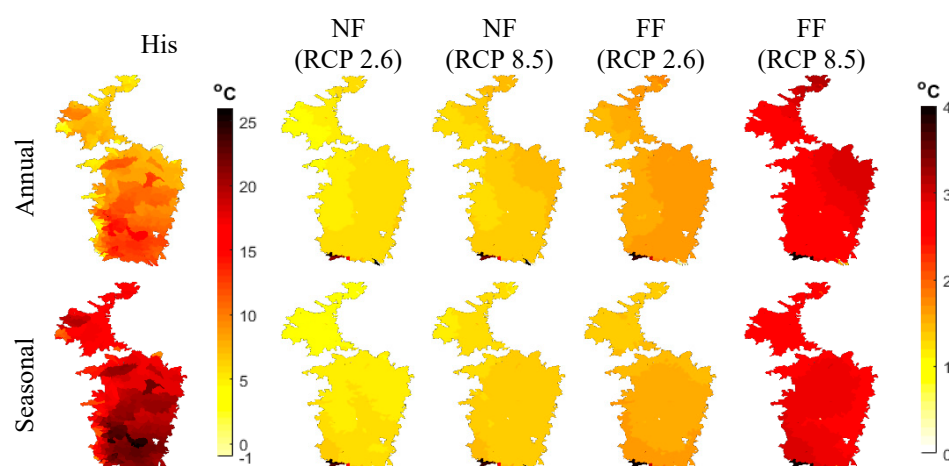

**Figure S1.** Spatial distribution of maximum temperature under RCP 2.6 and 8.5 scenarios, where His indicates historical period (1983-2007), NF indicates near future (2010-2034), and FF indicates far future (2040-2064). For historical period simulated temperature is shown in the map, and for the NF and FF difference of temperature is shown on the map. .

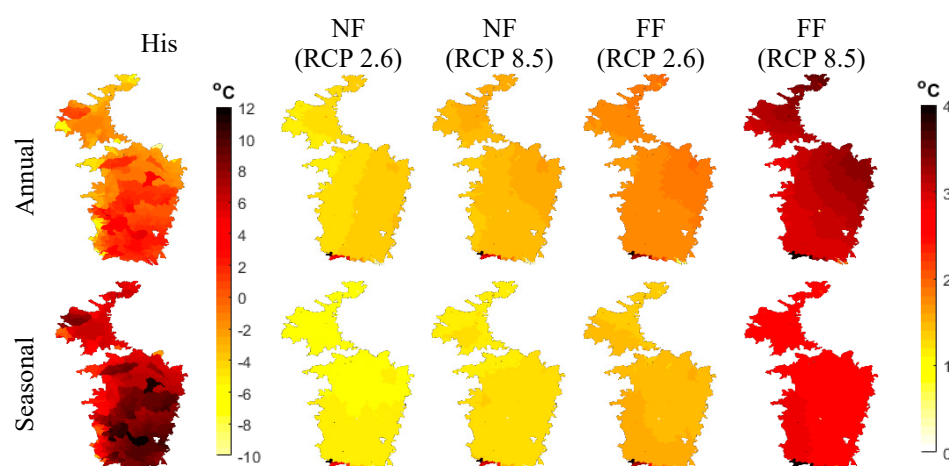

**Figure S2.** Spatial distribution of minimum temperature under RCP 2.6 and 8.5 scenarios, where His indicates historical period (1983-2007), NF indicates near future (2010-2034), and FF indicates far future (2040-2064). For historical period simulated temperature is shown in the map, and for the NF and FF difference of temperature is shown on the map.

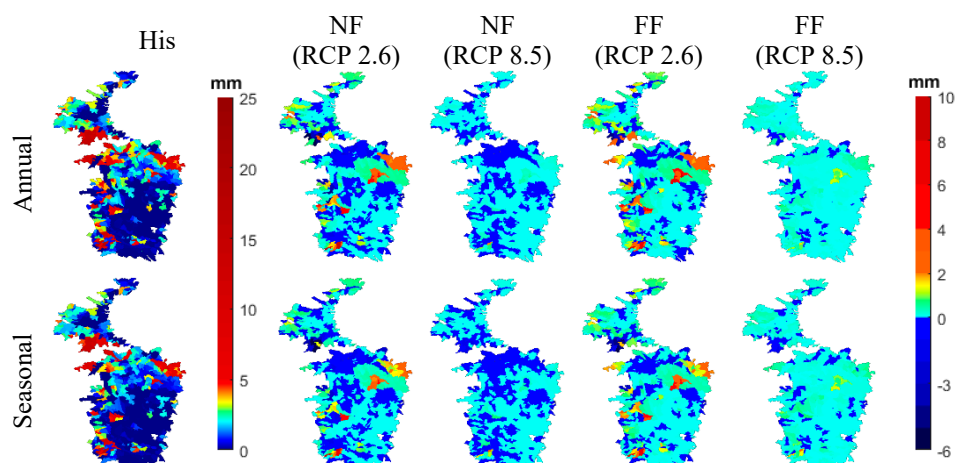

**Figure S3.** Spatial distribution of deep aquifer recharge under RCP 2.6 and 8.5 scenarios, where His indicates historical period (1983–2007), NF indicates near future (2010–2034), and FF indicates far future (2040–2064). For historical period simulated DA is shown in the map, and for the NF and FF difference of DA is shown on the map.

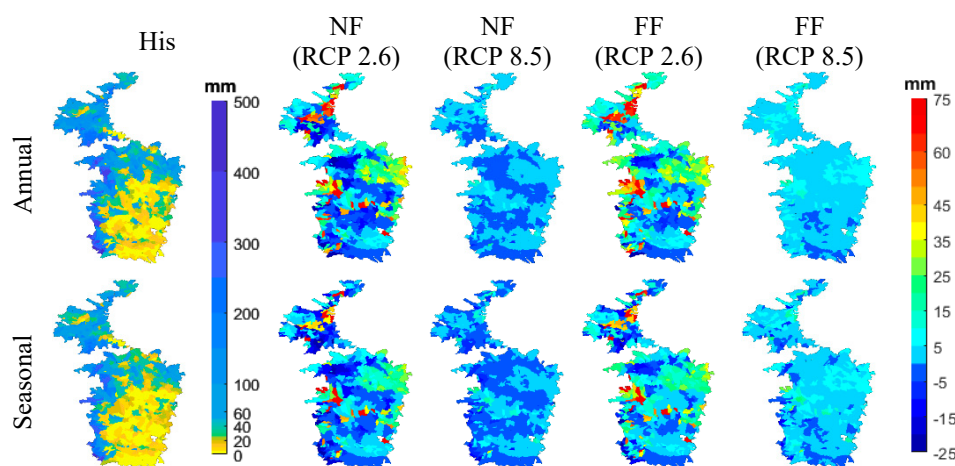

**Figure S4.** Spatial distribution of water yield under RCP 2.6 and 8.5 scenarios, where His indicates historical period (1983–2007), NF indicates near future (2010–2034), and FF indicates far future (2040–2064). For the period simulated WYLD is shown in the map, and for the NF and FF difference of WYLD is shown in the map.

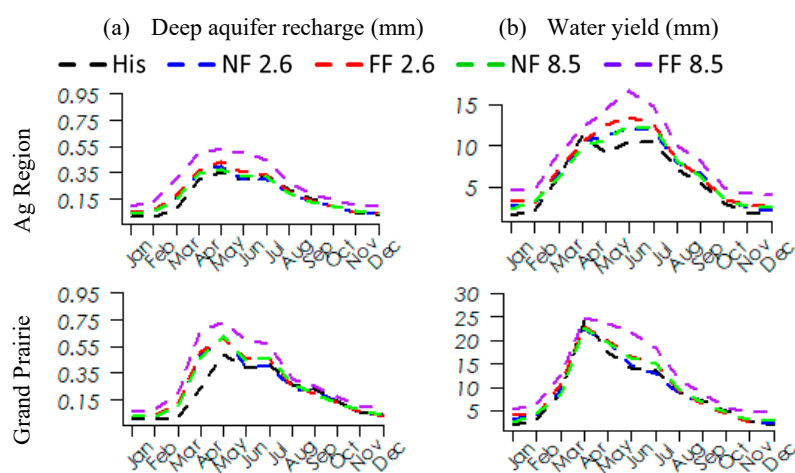

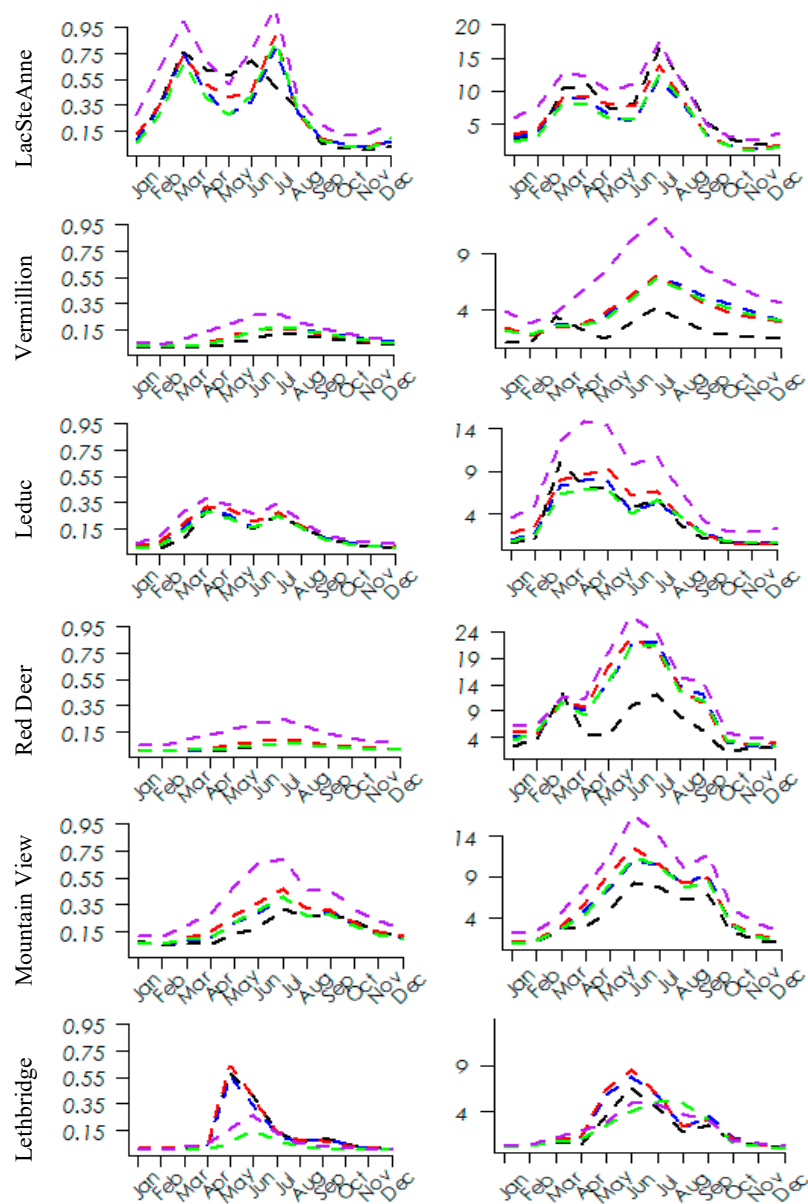

**Figure S5.** Long-term average monthly (a) deep aquifer recharge and (b) water yield in the study area and seven selected counties.
